# Supplementary material for: Genome-scale model of metabolism and gene expression provides a multi-scale description of acid stress responses in Escherichia coli
Source: PLoS Comput Biol. 2019 Dec 6;15(12):e1007525. doi: 10.1371/journal.pcbi.1007525 (PMC6897400; doi:10.1371/journal.pcbi.1007525)
Supplement: S11 Table — (XLSX) [file pcbi.1007525.s015.xlsx]

## Sheet: Sheet1
Table S11. pKa values of amino acids.
amino_acid	three_letter	one_letter	pKa	type
Cysteine	CYS	C	8.33	acid
Tyrosine	TYR	Y	10.07	acid
Aspartate	ASP	D	3.86	acid
Glutamate	GLU	E	4.25	acid
Histidine	HIS	H	6.04	base
Lysine	LYS	K	10.79	base
Arginine	ARG	R	12.48	base
